# Supplementary material
Source: bioRxiv or medRxiv preprint supplement (https://medrxiv.org/highwire/filestream/98151/field_highwire_adjunct_files/3/2020.09.22.20195628-4.pdf)

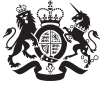

**If you have a cough, or fever, or shortness of breath and have been to any of these places in the last 14 days:**

- China
- Thailand
- Japan
- Republic of Korea
- Hong Kong
- Taiwan
- Singapore
- Malaysia
- Macau
- Vietnam
- Cambodia
- Laos
- Myanmar
- Northern Italy (north of Pisa)

**Stay indoors and call NHS 111**

**If you have returned from these specific areas:**

- Iran
- Specified towns in the Lombardy and Veneto regions in Northern Italy
- Daegu or Cheongdo in South Korea
- Hubei province (returned in the past 14 days)

**Make your way to your residence.  
Stay indoors and contact NHS 111  
even if you do not have symptoms**

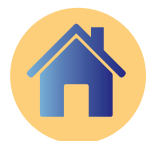

Supplement: Supplementary file [file 2020.09.22.20195628-4.pdf]
